# Supplementary material for: An intelligent, autocatalytic, DNAzyme biocircuit for amplified imaging of intracellular microRNAs
Source: Royal Society of Chemistry journal article supplement (doi:10.1039/d2nr05165f), 2022-12-06
Supplement: d2nr05165f1.pdf [file d2nr05165f1.pdf]

## Supporting Information

### An Intelligent, Autocatalytic, DNAzyme Biocircuit for Amplified Imaging of Intracellular MicroRNA

Meirong Cui, Dan Zhang, Qingfu Wang, Jie Chao\*

Key Laboratory for Organic Electronics and Information Displays, Jiangsu Key Laboratory for Biosensors, Institute of Advanced Materials (IAM), Jiangsu National Synergetic Innovation Center for Advanced Materials (SICAM), Nanjing University of Posts and Telecommunications, Nanjing 210023, P. R. China

\*Corresponding author: Jie Chao

Email : iamjchao@njupt.edu.cn. (J. Chao)

## Table of contents

|                             |   |
|-----------------------------|---|
| Reagents and Apparatus..... | 3 |
| Table S1.....               | 4 |
| Table S2.....               | 5 |

## Supplemental Figures

|                  |   |
|------------------|---|
| Figure S1 .....  | 6 |
| Figure S2 .....  | 6 |
| Figure S3 .....  | 6 |
| Figure S4 .....  | 7 |
| Figure S5 .....  | 7 |
| Figure S6 .....  | 8 |
| Figure S7 .....  | 8 |
| Figure S8 .....  | 8 |
| Figure S9 .....  | 9 |
| Figure S10 ..... | 9 |

**Reagents.** Manganese chloride tetrahydrate ( $\text{MnCl}_2 \cdot 4\text{H}_2\text{O}$ ) was purchased from Aladdin (Shanghai, China). Tetrachloroauric acid (III) hydrate ( $\text{HAuCl}_4 \cdot 3\text{H}_2\text{O}$ ), trisodium citrate (NaCit), 3-(4,5-dimethylthiazol-2-yl)-2,5-diphenyl bromide Azole (MTT) and SH-PEG were purchased from Sigma-Aldrich Inc. (St. Louis, MO). Hoechst 33342 and Lysotracker™ Green DND-26 were purchased from Invitrogen (Shanghai, China). High glucose DMEM and 1640 medium were purchased from KGI (Nanjing, China), and fetal bovine serum (FBS) was from Gibco Life Technologies. All other reagents were of analytical grade and were used without purification. Ultrapure water (resistivity  $18.2 \text{ M}\Omega \text{ cm}$  at  $25^\circ\text{C}$ ) from a Millipore purification system was used throughout the experiment.

**Apparatus.** Zeta potential and DLS were tested with a Malvern instrument (Nano-Z, Malvern Instruments Ltd., UK). UV-vis absorption spectras were recorded on a UV-vis spectrophotometer (UV-3600, Shimadzu Co., Japan). Transmission electron micrographs were acquired on a JEM-2100 transmission electron microscope (JEOL Ltd., Japan). Fluorescence emission spectra were acquired on a Shimadzu Fluorescence S-3 spectrophotometer (RF-5301PC, Shimadzu Co., Japan). Confocal fluorescence images of cells were obtained with an Olympus FV3000 confocal fluorescence microscope (Leica, Germany). Cell viability assays were performed using Thermo Scientific Varioskan Flash (Thermo Fisher Scientific, USA).

**Table S1** Sequences of oligonucleotides used for the miR-21 detection in this work.

| Name       | Sequence (5'-3')                                                                        |
|------------|-----------------------------------------------------------------------------------------|
| H1         | TTTTTCAACATCAGTCTGATAAGCTACCATGTGT<br>AGATAGCTTATCAGAC(Alexa-Fluor635)<br>GCGCGAAATAGTG |
| H2         | ATCTCTTCTCCGAGCCGGTCGCAGTCTGATAAGTC<br>ACTACACATGGTAGCTTATCAGACTGATGCCATG<br>TCTAGA     |
| S          | TAGCTTATCAGACTGATGTTGACACTA/ra/GGAAG<br>AGATGGCTATTCGGCACACAAGTGG                       |
| L          | CCACTTGTGCCGAATAGCCTAAAAGATAAAGTCA<br>GATATGCTA                                         |
| miR-21     | UAGCUUAUCAGACUGAUGUUGA                                                                  |
| mis-miR-21 | CACAGCCGGACTACTCCTAGTG                                                                  |
| Random DNA | AAGCTTATCTGACTGATGTTGT                                                                  |
| miR-141    | UAACACUGUCUGGUAAAGAUGG                                                                  |
| miR-182    | UUUGGCAAUGGUAGAACUCACACU                                                                |
| miR-197    | UUCACCACCUUCUCCACCCAGC                                                                  |

**Table S2** Sequences of oligonucleotides used for the miR-155 detection in this work.

| Name    | Sequence (5'-3')                                                                         |
|---------|------------------------------------------------------------------------------------------|
| 155-H1  | TTTTTACCCCTATCACGATTAGCATTAACCATGTGTAGATTAAT<br>GCTAAT(Alexa-Fluor635) CGCGAAATAGTGACCCC |
| 155-H2  | ATCTCTTCTCCGAGCCGGTCGATTAGCATTAATCTACACATGGT<br>TAATGCTAATCGTGATAGGCCATGTGTAGA           |
| 155-S   | TTAATGCTAATCGTGATAGGGGTCACTAT/ra/GGAAGAGATGGC<br>TATTCGGCACACAAGTGG                      |
| 155-L   | CCACTTGTGCCGAATAGCCTAAAAGATAAACGATAAGCATTAA                                              |
| miR-155 | UUAAUGCUAAUCGUGAUAGGGGU                                                                  |

## Supplemental Figures

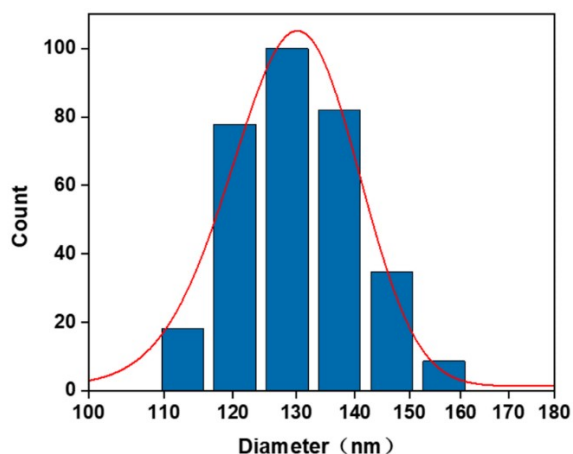

**Fig. S1** The DLS measurements of the MnO<sub>2</sub> nanosheets after sonication for 24 h.

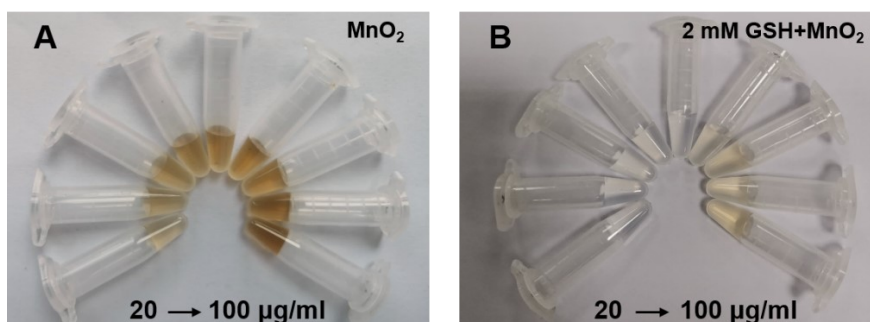

**Fig. S2** Photograph of MnO<sub>2</sub> nanosheets (20 to 100 µg/mL) solution before (A) and after (B) adding 2.0 mM GSH.

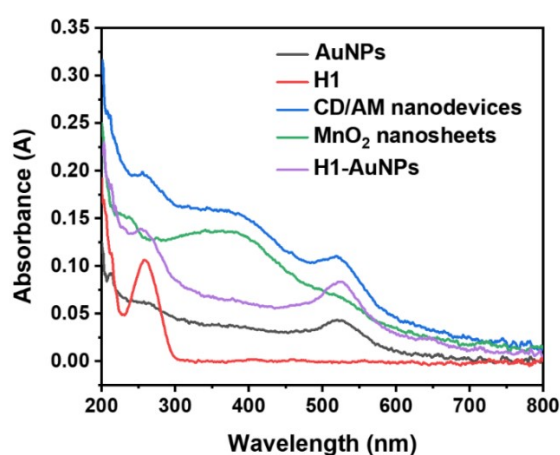

**Fig. S3** The UV-vis spectrum of AuNPs, H1, CD/AM nanodevices, MnO<sub>2</sub> nanosheets and H1-AuNPs.

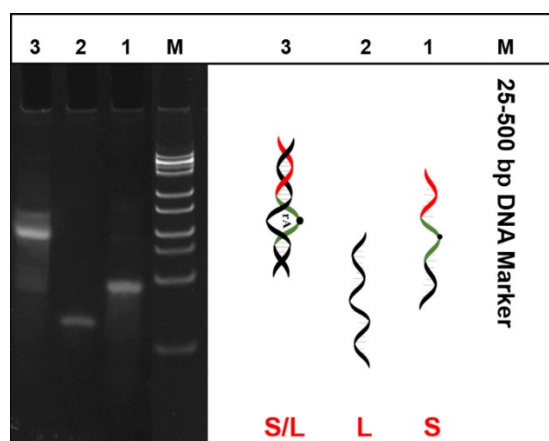

**Fig. S4** Gel electrophoresis characterization of the successful formation of dsDNA “S/L” . From right to left, M: 25-500 bp DNA marker; lane 1: ssDNA “S” (1 $\mu$ M); lane 2: ssDNA “L” (1 $\mu$ M); lane 3: dsDNA “S/L” (1 $\mu$ M).

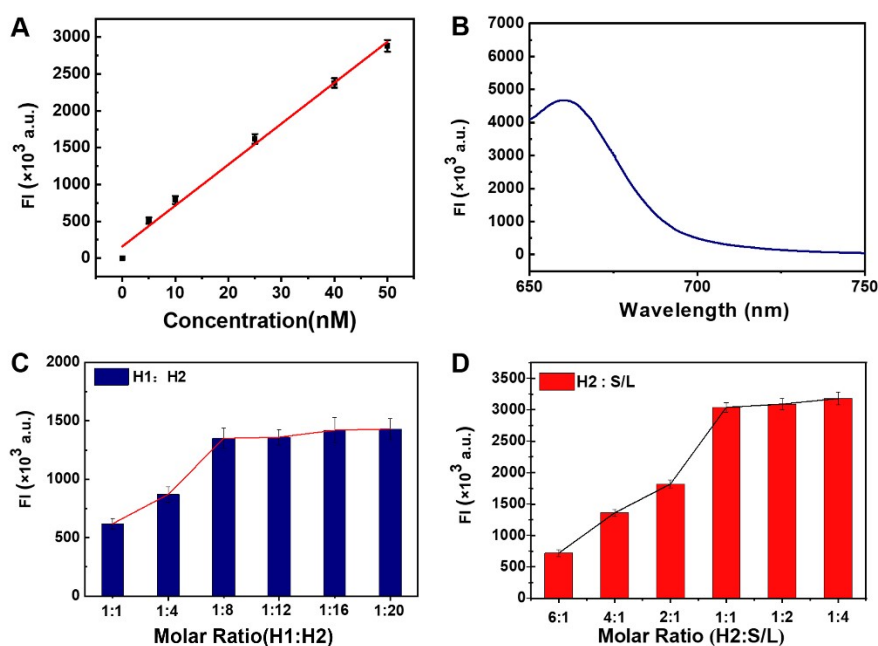

**Fig. S5** Fluorescence-based method to calculate the number of DNA loading on single AuNP and DNA-AuNPs on the MnO<sub>2</sub> nanosheets. (A) Standard curve for the fluorescence intensity of H1 with different concentrations. (B) Fluorescence spectrum of a representative mercaptoethanol treated functionalized AuNP sample (AuNP concentration was 1 nM). The amount of H1 was calculated to be 81 molecules per AuNP. (C) and (D) Fluorescence response of the CD/AM nanodevice with different molar ratio (H1:H2 and H2:S/L) for target miR-21 detection in the presence of GSH.

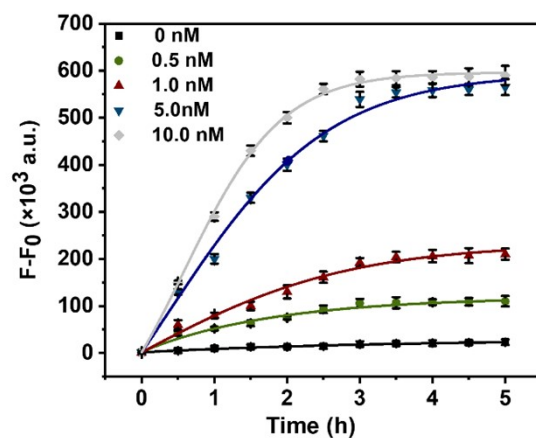

**Fig. S6** Time-dependent fluorescence changes of the cross-catalytic circuit at different concentrations of target miR-21: 10.0, 5.0, 1.0, 0.5 and 0 nM.

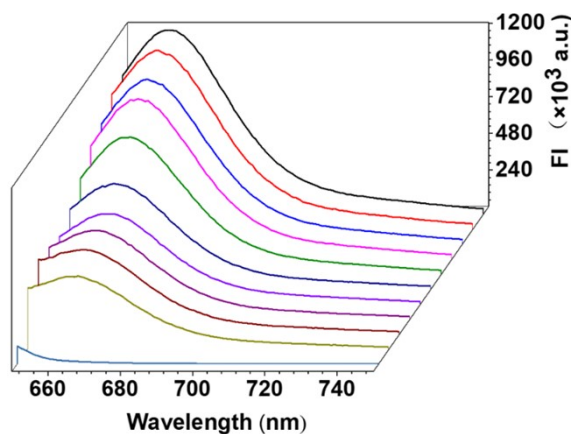

**Fig. S7** Fluorescence spectra of the CD/AM nanodevice in response to different concentrations of miR-21 (0, 0.05, 0.1, 0.5, 1, 1.5, 3, 5, 10, 20, 50, 100 nM) in vitro at 37 °C, excited at 635 nm.

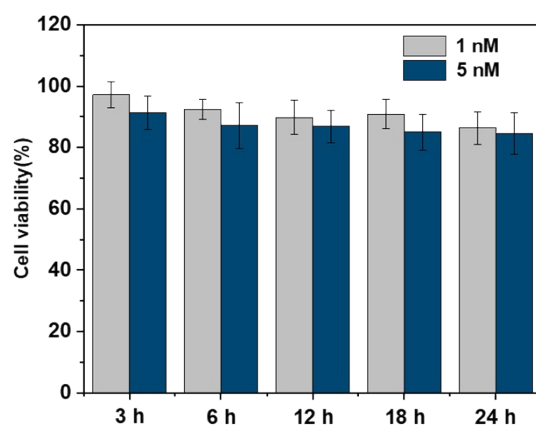

**Fig. S8** Cell viability of MCF-7 cells incubated with 1 nM CD/AM nanodevice and 5 nM CD/AM

nanodevice. Error bars represent the standard deviation of five replicates.

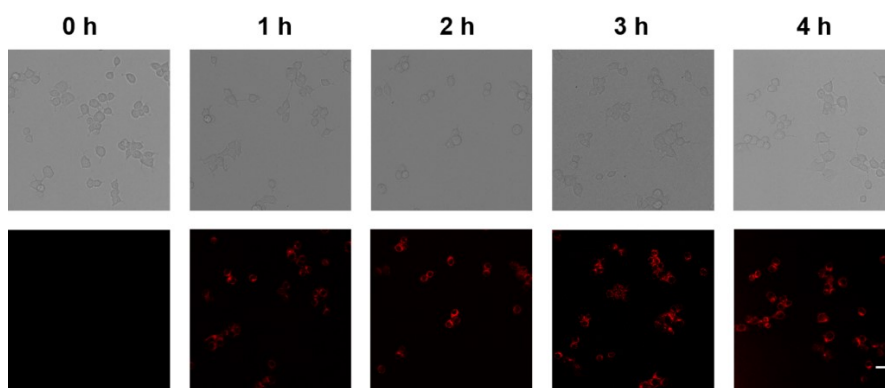

**Fig. S9** Time-dependent CLSM images of MCF-7 cells incubated with CD/AM nanodevice. Emission was collected by red channel (Cy5) at 660-750 nm with 635 nm excitation, scale bars: 20  $\mu\text{m}$ .

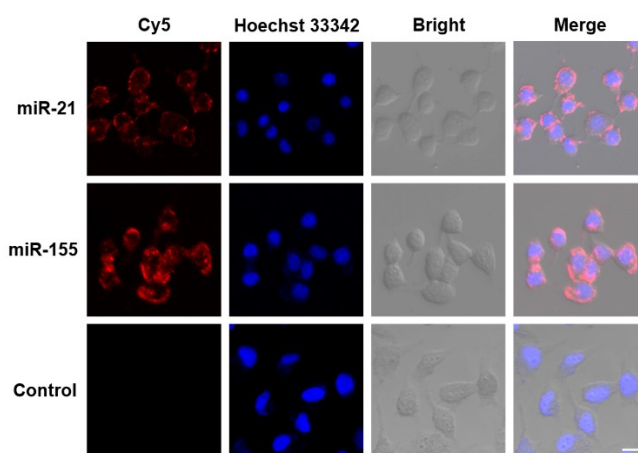

**Fig. S10** CLSM images of MCF-7 cells incubated with CD/AM nanodevice, CD/AM nanodevice 155, and PBS. Emission was collected by red channel (Cy5) at 660-750 nm with 635 nm excitation, scale bars: 20  $\mu\text{m}$ .
